# Supplementary material for: Nickel nanoparticles immobilized on three-dimensional nitrogen-doped graphene as a superb catalyst for the generation of hydrogen from the hydrolysis of ammonia borane
Source: Royal Society of Chemistry journal article supplement (doi:10.1039/c4ta03940h), 2014-01-01
Supplement: c4ta03940h1.pdf [file c4ta03940h1.pdf]

## Supporting Information

### Nickel nanoparticles immobilized on three-dimensional nitrogen-doped graphene as a superb catalyst for generation of hydrogen from hydrolysis of ammonia borane

Mojtaba Mahyari, Ahmad Shaabani\*

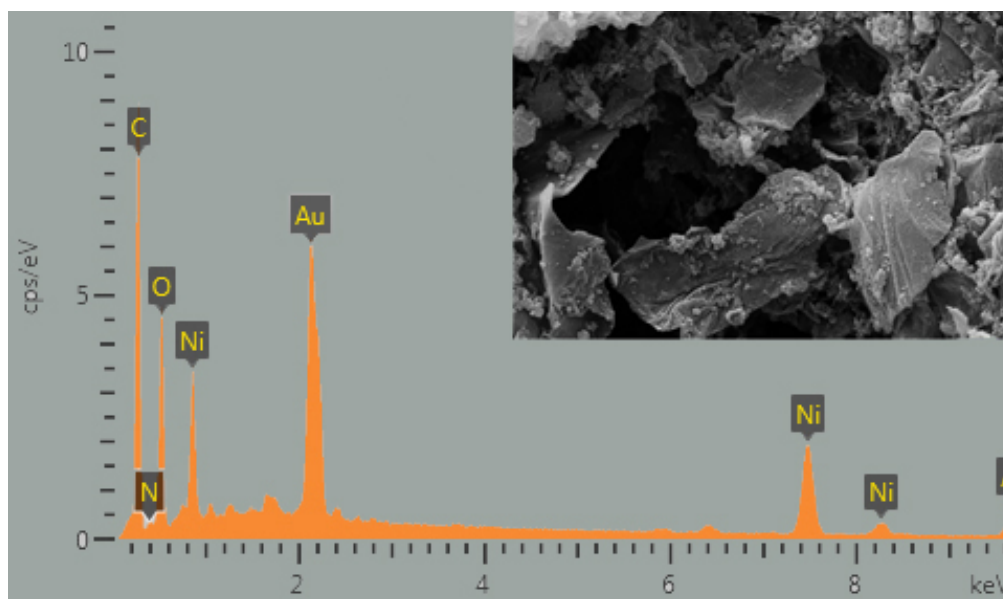

**Figure S1.** X-ray energy dispersive spectrum (EDS) of NiNPs@3D-(N)GFs

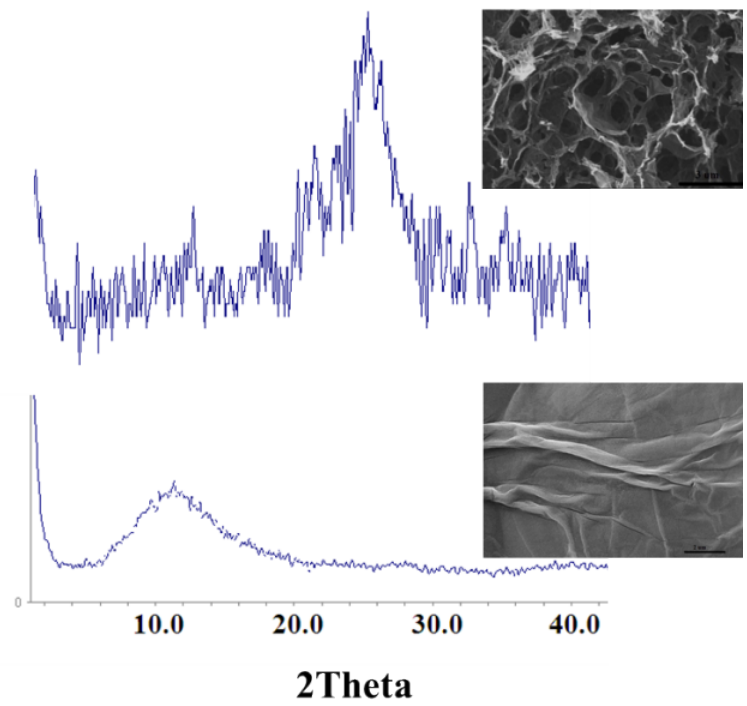

**Figure S2.** XRD patterns of GO and 3D-(N)GFs.

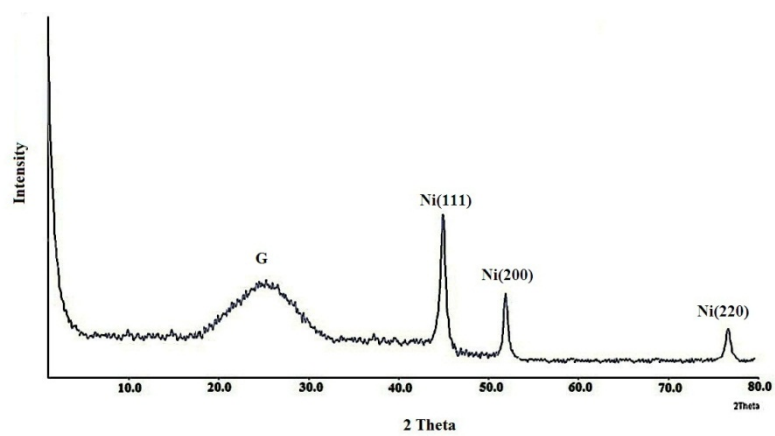

**Figure S3.** The XRD pattern of NiNPs@3D-(N)GFs

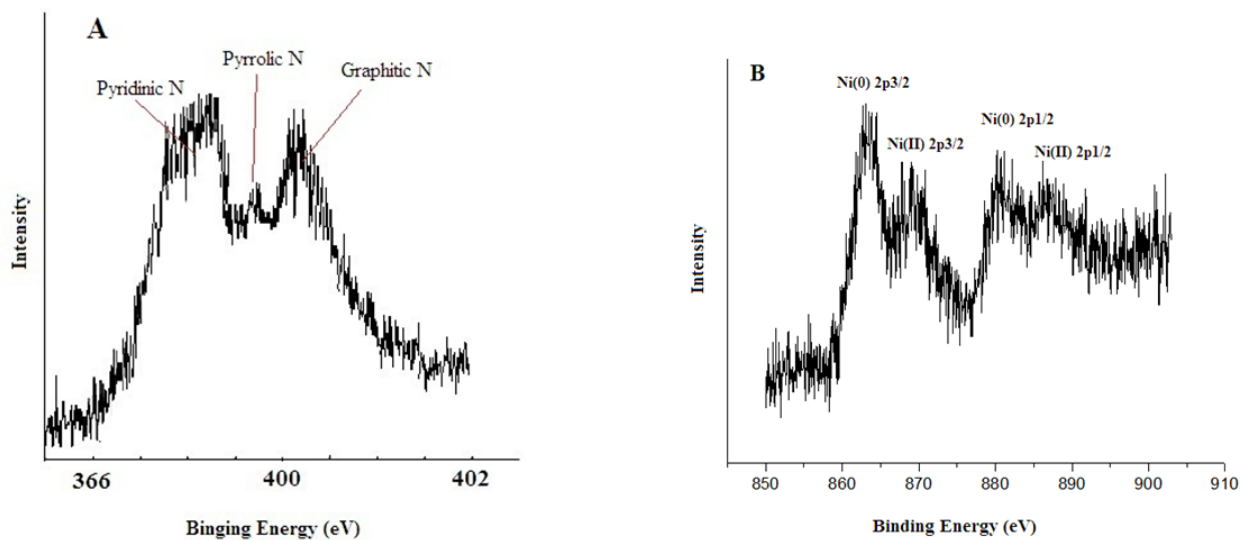

**Figure S4.** Wide scan XPS spectra of the N 1s (A), Ni 2p (B), and B1s of NiNPs@3D-(N)GFs

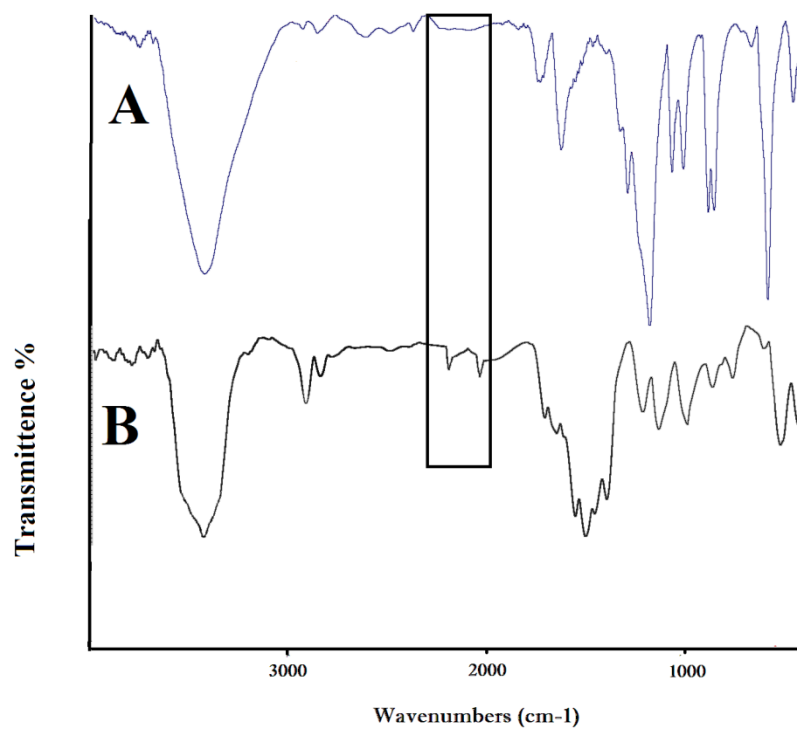

**Figure S5.** FT-IR spectra for GO (A) and 3D-(N)GFs (B)

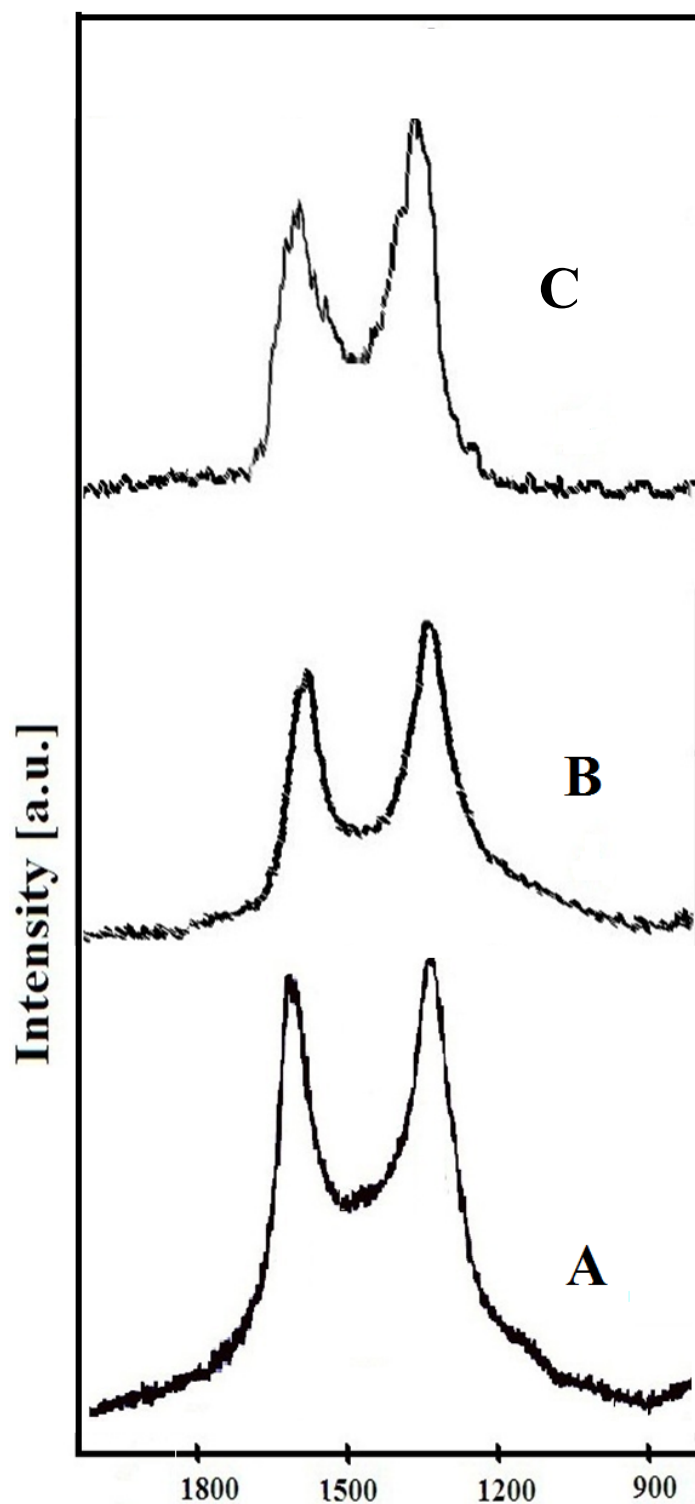

**Figure S6.** Raman spectra of the GO (A), 3D-GFs (B), and 3D-(N)GFs (C)

- Calculating turnover frequency (TOF)

Turnover frequency (TOF) was calculated with dividing the mol of H<sub>2</sub> per time of the reaction and mol of Ni catalyst. The amount of AB and catalyst for each reaction were 63.5 mg (2.06 mmol) and 10 mg (0.0187mmol Ni, catalyst contained 11% wt Ni),

respectively. On the other hand, 3 mmol H<sub>2</sub> was released per mol of AB. So, turn over number (TON) was calculated to be  $3 \times 2.06 / 0.0187 = 333$ . TOF was obtained by dividing TON per time,  $333 / 8 = 41.7$ .
